# Supplementary material
Source: PubMed Central journal article supplement (PMC2492461)
Supplement: 0801991105_0801991105SI.pdf [file 0801991105_0801991105SI.pdf]

# Supporting Information

Gongora *et al.* 10.1073/pnas.0801991105

```
11222222222233334
69111223445611354
79027257366105057

Ref      TTCATACATTTCCCTCTC

140-CH   ...GC..GCCCTTC..T
9-CH     ...GC...CCTTC..T
5-CH     .C.GC...CCCTTC..T
8-CH     ...GC...CCCTTC..T
11-CH    .....
141-CH   .....C.
17-CH    C.TG..T..C...C...
128-CH   ...GCG..CCCTTCT.T
```

**Fig. S1.** Haplotypes identified among Chilean chickens. Numbers indicate the site position of the variable sites. Dots indicate identity with the reference sequence (GenBank accession no. AB098668) (1), and different base letters denote substitution.

1. Komiyama T, Ikeo K, Gojobori T (2003) Where is the origin of the Japanese gamecocks? *Gene* 317:195–202.









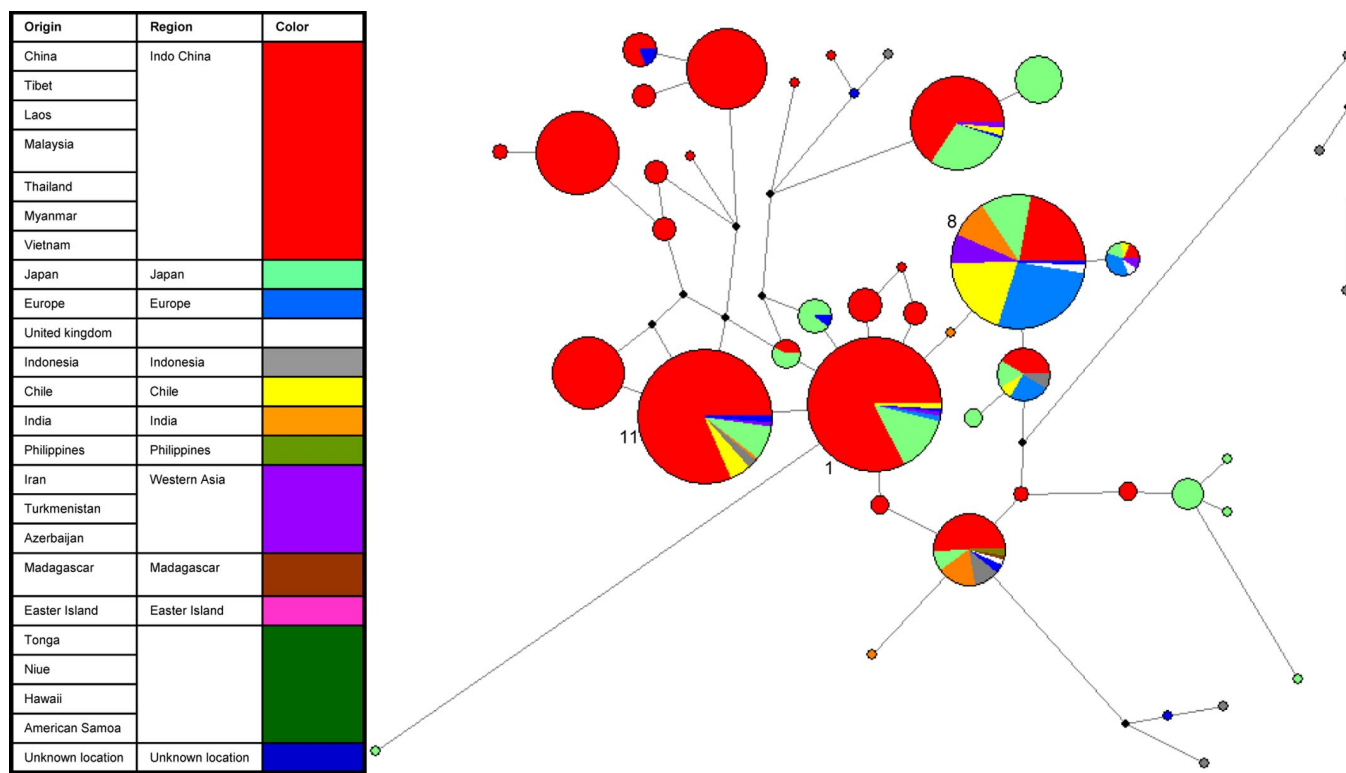

**Fig. S4.** Median-joining network start showing the position of 41 Chilean modern chickens (yellow) among native and wild junglefowl from Asia, Africa, and Europe. Only major and relevant networks are presented here by using 534 bp of the mtDNA CR. Circle size is proportional to the frequency of the corresponding haplotypes, and the geographical origin of the haplotypes are distinguished by use of color codes described in the table next to the figure. Most of the Chilean chickens cluster with Indian subcontinental/European/Chinese chickens, whereas other Chilean chickens cluster with haplogroups predominant of South and eastern Chinese/Japanese/Indonesian chickens.

| Origin           | Region        | Color       |                  |
|------------------|---------------|-------------|------------------|
| China            | Indo China    | Red         |                  |
| Tibet            |               |             |                  |
| Laos             |               |             |                  |
| Malaysia         |               |             |                  |
| Thailand         |               |             |                  |
| Myanmar          |               |             |                  |
| Vietnam          |               |             |                  |
| Japan            | Japan         |             | Green            |
| Europe           | Europe        |             | Blue             |
| United kingdom   |               |             |                  |
| Indonesia        | Indonesia     | Grey        |                  |
| Chile            | Chile         | Yellow      |                  |
| India            | India         | Orange      |                  |
| Philippines      | Philippines   | Light Green |                  |
| Iran             | Western Asia  | Purple      |                  |
| Turkmenistan     |               |             |                  |
| Azerbaijan       |               |             |                  |
| Madagascar       | Madagascar    | Brown       |                  |
| Easter Island    | Easter Island | Pink        |                  |
| Tonga            |               | Dark Green  |                  |
| Niue             |               |             |                  |
| Hawaii           |               |             |                  |
| American Samoa   |               |             |                  |
| Unknown location |               |             | Unknown location |

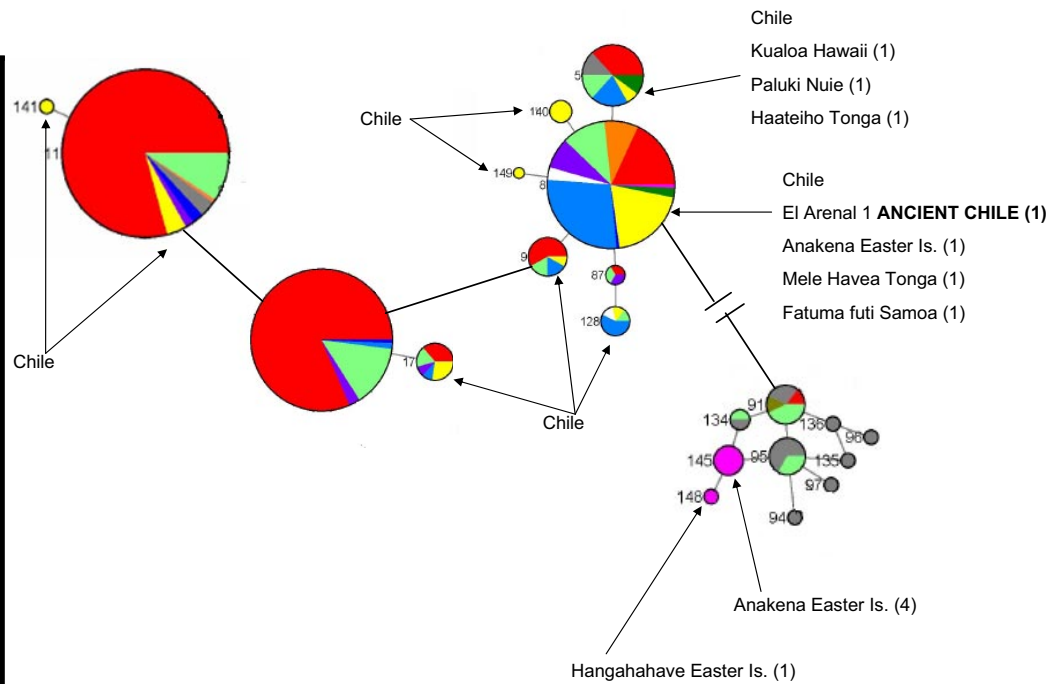

**Fig. S5.** Simplified median-joining networks showing the relationships and clustering of 205 bp of the mtDNA control region from worldwide, Chilean Araucana, pre-Columbian, and ancient Pacific/Polynesian chickens. The numbers next to the circles correspond to the haplotype clade number. The area of each circle is proportional to the frequency of the corresponding haplotypes, and the geographical origins of the haplotypes are distinguished by use of color codes described in the table next to the figure. Most of the Chilean chickens cluster with Indian subcontinental/European/Chinese chickens, more specifically with haplotype numbers 5, 8, 9, 128, and 140. The other Chilean chickens cluster with haplotypes predominant in South and eastern Chinese/Japanese/Indonesian chickens (haplotypes numbers 11, 17, and 141). Pre-Columbian sequence clusters with haplotype number 8. A more complete description of this MJN is presented in Fig. 1. Certain closely related haplotypes described in this and other figures have collapsed into others because of ambiguities and different length sequences.

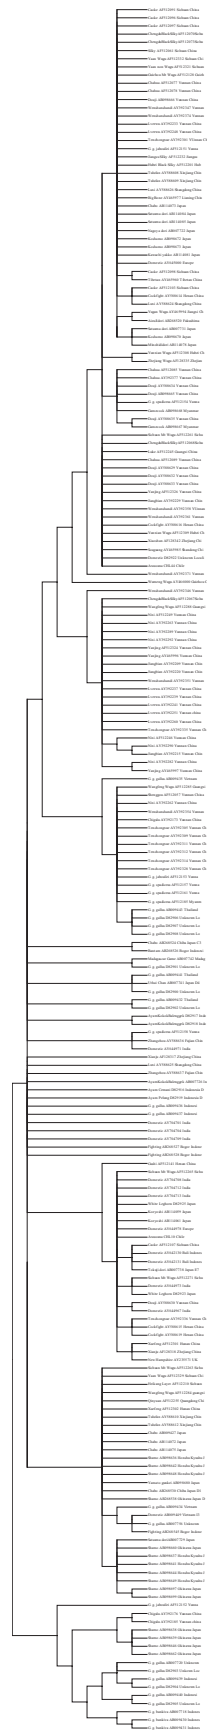

Fig. S6. Strict consensus MP tree. It was constructed from 30,276 trees left as described in *Materials and Methods*.



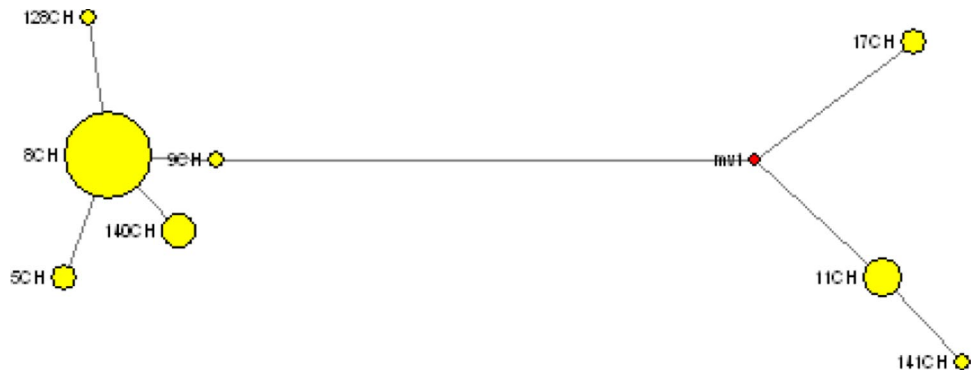

**Fig. S7.** MJN showing eight haplotypes of 41 modern Chilean chickens based by using 530 bp of the mtDNA CR sequences. The area of each circle is proportional to the frequency of the corresponding haplotypes described in [supporting information \(SI\) Table S1](#). Clustering of these sequences among native chickens and wild junglefowl from Asia, Africa, and Europe is shown in yellow in Fig. 1 and [Figs. S4 and S5](#).

Table S1. Voucher information of modern Chilean chicken samples collected from latitudes 33° to 40° S

| Sample ID | Breed or type                  | Flock                                                      | Sex (♀/♂) | Chilean haplotype name | Haplotype no. as indicated in network analyses |
|-----------|--------------------------------|------------------------------------------------------------|-----------|------------------------|------------------------------------------------|
| CHL1      | Ketro                          | A Pirque 1, Santiago (Lat 33° 40' S, Long 70° 28' W)       | ♂         | 11-CH                  | 11                                             |
| CHL2      | Kollonca                       | ♂                                                          | 8-CH      | 8                      |                                                |
| CHL3      | Kollonca                       | ♀                                                          |           |                        |                                                |
| CHL4      | Kollonca                       | ♀                                                          |           |                        |                                                |
| CHL5      | Creole/naked neck              | ♂                                                          | 17-CH     | 17                     |                                                |
| CHL6      | Kollonca                       | ♀                                                          | 11-CH     | 11                     |                                                |
| CHL7      | Creole                         | B Pirque 2, Santiago (Lat 33° 39' S, Long 70° 27' W)       | ♂         | 8-CH                   | 8                                              |
| CHL8      | Kollonca                       | C Antiquina, Arauco (Lat 38° 11' S, Long 73° 25' W)        | ♂         | 8-CH                   | 8                                              |
| CHL9      | Kollonca                       | ♂                                                          | 8-CH      | 8                      |                                                |
| CHL10     | Ketro                          | ♀                                                          | 140-CH    | 140                    |                                                |
| CHL11     | Kollonca de Aretes             | ♀                                                          | 8-CH      | 8                      |                                                |
| CHL12     | Kollonca                       | ♀                                                          | 8-CH      | 8                      |                                                |
| CHL13     | Kollonca                       | ♂                                                          | 8-CH      | 8                      |                                                |
| CHL14     | Creole                         | D Malihue, Valdivia (Lat 39° 44' S, Long 72° 38' W)        | ♀         | 8-CH                   | 8                                              |
| CHL15     | Creole                         | ♀                                                          | 8-CH      | 8                      |                                                |
| CHL16     | Kollonca                       | G Cañete, Arauco (Lat 37° 47' S, Long 73° 23' W)           | ♂         |                        |                                                |
| CHL17     | Ketro                          | ♂                                                          | 11-CH     | 11                     |                                                |
| CHL18     | Kollonca                       | ♂                                                          | 8-CH      | 8                      |                                                |
| CHL19     | Creole                         | E Ninhue, Chillán (Lat 36° 21' S, Long 72° 23' W)          | ♀         | 8-CH                   | 8                                              |
| CHL20     | Creole                         | F Yumbel, Chillán (Lat 37° 02' S, Long 72° 32' W)          | ♀         | 140-CH                 | 140                                            |
| CHL21     | Kollonca                       | G Cañete, Arauco (Lat 37° 47' S, Long 73° 23' W)           | ♂         | 8-CH                   | 8                                              |
| CHL22     | Ketro                          | ♀                                                          | 140-CH    | 140                    |                                                |
| CHL23     | Ketro                          | ♀                                                          | 5-CH      | 5                      |                                                |
| CHL24     | Kollonca                       | ♀                                                          | 9-CH      | 9                      |                                                |
| CHL25     | Ketro                          | ♀                                                          | 8-CH      | 8                      |                                                |
| CHL26     | Kollonca                       | ♀                                                          | 5-CH      | 5                      |                                                |
| CHL27     | Kollonca                       | ♀                                                          | 8-CH      | 8                      |                                                |
| CHL28     | Ketro                          | ♂                                                          | 8-CH      | 8                      |                                                |
| CHL29     | Ketro                          | ♀                                                          | 140-CH    | 140                    |                                                |
| CHL30     | Kollonca                       | ♀                                                          | 8-CH      | 8                      |                                                |
| CHL31     | Kollonca                       | B Pirque 2, Santiago (Lat 33° 39' S, Long 70° 27' W)       | ♂         | 17-CH                  | 17                                             |
| CHL32     | Kollonca                       | ♀                                                          | 128-CH    | 128                    |                                                |
| CHL33     | Ketro                          | ♀                                                          | 8-CH      | 8                      |                                                |
| CHL34     | Japanese Long Tail ancestry    | ♂                                                          | 8-CH      | 8                      |                                                |
| CCHL35    | Kollonca                       | ♂                                                          | 8-CH      | 8                      |                                                |
| CHL36     | Kollonca                       | ♀                                                          | 11-CH     | 11                     |                                                |
| CHL37     | Ketro                          | ♂                                                          | 11-CH     | 11                     |                                                |
| CHL38     | Creole                         | ♀                                                          | 8-CH      | 8                      |                                                |
| CHL39     | Passion fowl                   | ♀                                                          | 8-CH      | 8                      |                                                |
| CHL41     | Passion fowl                   | H Viña del Mar, Valparaíso (Lat 32° 59' S, Long 71° 33' W) | ♂         | 8-CH                   | 8                                              |
| CHL40     | Passion fowl                   | ♂                                                          | 8-CH      | 8                      |                                                |
| CHL42     | Passion fowl                   | ♀                                                          | 8-CH      | 8                      |                                                |
| CHL43     | Ketro                          | J Melipilla, Santiago (Lat 33° 42' S, Long 71° 13' W)      | ♂         | 8-CH                   | 8                                              |
| CHL44     | Passion fowl/Sebright ancestro | I El Monte, Santiago (Lat 33° 42' S, Long 70° 58' W)       | ♀         | 141-CH                 | 141                                            |

Creole translates from "criollo" and stands for an unselected smallholder chicken typical of the countryside. DNA extraction procedures failed for samples 3, 4, and 16.

**Table S2. Calibration of one direct date on chicken bone with increasing proportion of marine-derived carbon**

| $\Delta R$    | Marine C, % | Calibration dataset   | Radiocarbon on chicken bones from the El Arenal-1, Chile ( $n = 622 \pm 35$ ) |
|---------------|-------------|-----------------------|-------------------------------------------------------------------------------|
| $0 \pm 0$     | 0           | SHCal04               | <b>AD1304–1424</b>                                                            |
| $154 \pm 131$ | 10          | Mixed marine<br>SoHem | <b>AD1387–1449</b>                                                            |
| $154 \pm 131$ | 20          | Mixed marine<br>SoHem | <b>AD1395–1492</b>                                                            |
| $154 \pm 131$ | 30          | Mixed marine<br>SoHem | AD1412–1620                                                                   |
| $154 \pm 131$ | 40          | Mixed marine<br>SoHem | AD1440–1644                                                                   |
| $154 \pm 131$ | 50          | Mixed marine<br>SoHem | AD1439–1796                                                                   |

$\Delta R$  of  $137 \pm 114$  based on Ingram and Southon's (1) single bivalve determination from Valparaiso, Chile combined with Taylor and Berger's (2) gastropod date from approximately the same location. Given the problems inherent with the use of gastropods for characterizing marine reservoir effects, the derived  $\Delta R$  value is used simply for illustrative purposes. All calibrated dates are reported at  $2\sigma$ . Bold type denotes pre-Columbian values.

- Ingram BL, Southon JR (1996) Reservoir ages in Eastern Pacific coastal and estuarine waters. *Radiocarbon* 38:573–582.
- Taylor RE, Berger R (1967) Radiocarbon content of marine shells from the Pacific coasts of Central and South America. *Science* 158:1180–1182.

**Table S3. Frequency of modern Chilean chicken haplotypes**

| Haplotype | Frequency |
|-----------|-----------|
| 17-CH     | 2         |
| 11-CH     | 5         |
| 141-CH    | 1         |
| 140-CH    | 4         |
| 5-CH      | 2         |
| 9-CH      | 1         |
| 8-CH      | 25        |
| 128-CH    | 1         |
| Total     | 41        |

**Table S4.  $\Delta R$  values for the west coast of South America (after Reimer and Reimer 2008)**

| Longitude | Latitude | $\Delta R$ | Location              | Ref | Collection Reservoir |          | $^{14}\text{C}$ age | Lab no.      | Taxa                    | Diet               |
|-----------|----------|------------|-----------------------|-----|----------------------|----------|---------------------|--------------|-------------------------|--------------------|
|           |          |            |                       |     | year                 | age      |                     |              |                         |                    |
| -80.00    | -3.00    | -216 ± 37  | Guayaquil, Ecuador*   | 10  | 1927                 | 85 ± 38  | 235 ± 37            | UCIA-1249A   | Cerithidea valida       | Deposit feeder     |
| -80.00    | -3.00    | 84 ± 45    | Guayaquil, Ecuador*   | 10  | 1927                 | 386 ± 46 | 536 ± 45            | UCLA-1249B   | Thais biserialis        | Carnivore          |
| -80.00    | -10.00   | 243 ± 49   | Northern Peru*        | 10  | 1935 <sup>†</sup>    | 544 ± 50 | 700 ± 49            | UCLA-1282    | Strombus peruvianus     | Herbivore/omnivore |
| -78.00    | -14.00   | 670 ± 44   | Peru*                 | 10  | 1935 <sup>†</sup>    | 971 ± 45 | 1127 ± 44           | UCLA-1279    | Oliva peruviana         | Unknown            |
| -70.00    | -24.00   | 175 ± 34   | Antofagasta, Chile*   | 10  | 1925                 | 477 ± 35 | 626 ± 34            | UCLA-1277    | Concholepas concholepas | Carnivore          |
| -72.00    | -33.00   | 313 ± 76   | Valparaiso, Chile*    | 10  | 1935 <sup>†</sup>    | 614 ± 77 | 770 ± 76            | UCLA-1278    | Tequila aler            | Unknown            |
| -71.80    | -33.10   | 61 ± 50    | Valparaiso, Chile     | 6   | 1939 <sup>‡</sup>    | 370 ± 51 | 520 ± 50            | CAMS-17919/1 | Mytilus californianus   | Suspension feeder  |
| -72.65    | -51.70   | 221 ± 40   | Puerto Natales, Chile | 6   | 1939 <sup>‡</sup>    | 530 ± 41 | 680 ± 40            | CAMS-17918   | Mytilus californianus   | Suspension feeder  |

Marine reservoir effects for Chile are poorly resolved. There are eight  $\Delta R$  values published for the west coast of South America between the equator and Cape Horn. All but one of these values can be shown to be problematic. Six of these values were published by Taylor and Berger (10) on the basis of dating of gastropods. Over the last 20 years, several studies have indicated that detrital feeders are potentially problematic because ingested organic carbon from diverse sources can become incorporated into shell structures through metabolic action (5, 9). These effects have been found to be particularly problematic in limestone-dominated areas (1, 4). It is for this reason that the use of suspension feeders, herbivores, and omnivores is recommended in  $\Delta R$  research. Taylor and Berger's sample contains two carnivores, a deposit feeder, and two other gastropods for which dietary information is lacking. Only the determination on *Strombus peruvianus* from northern Peru is unproblematic as a herbivore/omnivore, resulting in  $\Delta R = 243 \pm 49$ . In Ingram and Southon's (6) more recent study focused on California included two samples of the suspension-feeding bivalve *Mytilus californianus* from Chile. The sample from Puerto Natales is an estuarine reservoir value, potentially influenced by terrestrial runoff and incomplete exchange with the open ocean and therefore may not reflect open water reservoir conditions (11). This leaves the determination from Valparaiso in central Chile, resulting in  $\Delta R = 61 \pm 50$ . This single  $\Delta R$  value provides the single reliable estimate for marine reservoir effect in near-shore open waters in southern South America. However, this value is likely to underestimate  $\Delta R$  in the region because of heavily depleted Antarctic source waters brought to the Chilean coastline by the Antarctic circumpolar current. Seven values are reported in the Marine Reservoir Database for northern Antarctica (7) giving a combined  $\Delta R = 871 \pm 176$  (see refs. 2, 3, 8). We believe, therefore, that the  $\Delta R = 61 \pm 50$  from Valparaiso should be treated as a conservative estimate of open water marine reservoir effect in Chile.

\*Approximate location.

<sup>†</sup>Mid-point. Collected between 1930–1940 (10).

<sup>‡</sup>Ingram and Southon (1996:574) state that "n most cases, it is uncertain whether these specimens were collected live or not."

1. Anderson AT, Higham FG, Wallace R (2001) The radiocarbon chronology of the Norfolk Island archaeological sites. *Rec Australian Mus* 27(Supplement):33–42.
2. Berkman PA, Forman SL (1996) Pre-bomb radiocarbon and the reservoir correction for calcareous marine species in the Southern Ocean. *Geophys Res Lett* 23:363–366.
3. Bjorck S, Hjort C, Ingolfsson O, Skog G (1991) Radiocarbon dates from the Antarctic peninsula region—problems and potential. *Radiocarbon Dating: Recent Applications and Future Potential*, ed Lowe JJ (Quaternary Research Association, Cambridge, UK), Quaternary Proceedings 1, pp 55–65.
4. Dye T (1994) Apparent ages of marine shells: Implications for archaeological dating in Hawaii. *Radiocarbon* 36:51–57.
5. Hogg AG, Higham TFG, Dahm J (1998)  $^{14}\text{C}$  dating of modern marine and estuarine shellfish. *Radiocarbon* 40:975–984.
6. Ingram BL, Southon JR (1996) Reservoir ages in Eastern Pacific coastal and estuarine waters. *Radiocarbon* 38:573–582.
7. Reimer P, Reimer R (2008) Marine reservoir correction database. <http://calib.qub.ac.uk/marine>, accessed February 10, 2008.
8. Peck LS, Brey T (1996) Bomb signals in old Antarctic brachiopods. *Nature* 380:207–208.
9. Tanaka N, Monaghan MC, Rye DM (1986) Contribution of metabolic carbon to mollusk and barnacle shell carbonate. *Nature* 320:520–523.
10. Taylor RE, Berger R (1967) Radiocarbon content of marine shells from the Pacific coasts of Central and South America. *Science* 158:1180–1182.
11. Ulm S (2002) Marine and estuarine reservoir effects in central Queensland, Australia: Determination of  $\Delta R$  values. *Geoarchaeology* 17:319–348.
12. Taylor RE, Berger R (1967) Radiocarbon content of marine shells from the Pacific coasts of Central and South America. *Science* 158:1180–1182.

## Other Supporting Information Files

[Table S5 \(XLS\)](#)

[Table S6 \(XLS\)](#)
